## 402

# A WIRELESS PATCH-BASED POLYSOMNOGRAPHY SYSTEM FOR SLEEP STUDIES: EFFECT OF THE 2016 AASM RULES ON AHI IN NORMAL INDIVIDUALS

Jantina de Vries,<sup>1</sup> Alessandro Rossi,<sup>1</sup> Ruben De Francisco,<sup>1</sup>

Soukaina Adnane,<sup>1</sup> Hartmut Schneider,<sup>2</sup> Daniela Andries<sup>3</sup>

<sup>1</sup>Onera Health, <sup>2</sup>Johns Hopkins University, <sup>3</sup>American Sleep Clinic

**Introduction:** Current home sleep test (HST) devices are limited by an absence of EEG, or by being too cumbersome to use. We developed a wireless PSG system (Onera Health, NL) consisting of four disposable patches to record EEG, EOG, EMG, SaO<sub>2</sub>, ECG, bioimpedance derived respiratory airflow and effort, airflow via nasal cannula, snoring sounds, body position, actigraphy, and leg movements. Signals are stored on reusable electronic modules attached to each patch.

**Methods:** We measured PSG hook-up time in 15 healthy laypersons (6 male, 9 female, age 18-to-70 yrs, BMI 29.7±5.2 kg/m<sup>2</sup>). We also enrolled 6 additional asymptomatic healthy volunteers (2 male, 4 female, age 27-to-33 yrs, BMI 24.3±5.7 kg/m<sup>2</sup>) with history of occasional snoring, on which we scored the apnea-hypopnea index (AHI) using data from our patch-based PSG system recorded at home. We evaluated scoring using the 2016 AASM rules for hypopneas in comparison to the 2007 AASM rules requiring a greater than 3% fall in SaO<sub>2</sub> for obstructive hypopneas.

**Results:** Mean hook-up time for applying all four patches and electronic modules was 4:42 ± 1:20 min. Mean home sleep efficiency was 89.5 SE 1.9% with an average REM% of 20 SE 6.7%. When comparing the 2016 vs 2007 AASM rules for scoring hypopneas, the AHI increased more than threefold during NREM (9.0 SE 2.0/h vs 2.7 SE 0.8/h; p<0.03) and minimally during REM (11.7 SE 2.3/h and 7.1/h SE 1.8/h; p<0.01), implying an overall increase in the AHI from 3.7 SE 0.8/h to 9.9 SE 1.9/h; p<0.02. One subject changed AHI category from normal to mild (3.6 to 14.4/h), another from mild to moderate (12.7 to 26.3/h) using the 2016 AASM rules.

**Conclusion:** Our wireless patch-based PSG system is an easy solution for sleep studies at home or in the sleep lab, lowering the burden to conduct large scale epidemiologic sleep studies. The presence of standard EEG signals allows to determine NREM and REM statistics, respiratory and non-respiratory arousal indices, AHI and RERA's by sleep stages. Preliminary study results show that using cortical arousal criteria for hypopneas, the AHI increase is more pronounced in NREM compared to REM sleep.

**Support (if any):**

## 403

# COMPARATIVE STUDY OF WIRELESS SENSORS VERSUS TYPE III HOME SLEEP APNEA TEST FOR HOME-BASED DIAGNOSIS OF OBSTRUCTIVE SLEEP APNEA

Jong Yoon Lee,<sup>1</sup> Donghyun Kim,<sup>2</sup> Stefanida Blake,<sup>3</sup> Lakshmi Kalluri,<sup>3</sup>

Jessica Walter,<sup>4</sup> Charles Davies,<sup>5</sup> Phyllis Zee,<sup>6</sup> Shuai Xu,<sup>7</sup>

Thomas Power<sup>8</sup>

<sup>1</sup>Sibel, Inc, <sup>2</sup>Sibel Health, Inc, <sup>3</sup>Anthem Inc., <sup>4</sup>University of Pennsylvania, <sup>5</sup>Carle Physician Group and Carle Illinois College of Medicine, <sup>6</sup>Northwestern University, Feinberg School of Medicine, <sup>7</sup>Northwestern University, <sup>8</sup>AIM Specialty Health

**Introduction:** More than 22 million Americans are estimated to have obstructive sleep apnea (OSA), though this disease remains perpetually underdiagnosed. Undiagnosed OSA contributes to poor clinical outcomes, large healthcare costs and an economic burden in excess of \$150 billion dollars annually. While polysomnography (PSG) is considered the gold standard to diagnose OSA home sleep apnea testing

(HSAT) is now used for most patient cohorts. Wireless sensors may offer a lower cost and less burdensome approach to home testing than traditional HSAT.

**Methods:** We performed a fully remote, national, single-arm, open-label, prospective clinical study to evaluate the performance of a wireless, two sensor experimental system (ANNETM One, Sibel Health) against a Type III HST system. A total of 154 individuals completed screening with 62 screening in as high risk for OSA using the STOP-BANG questionnaire. Ultimately 60 participants were enrolled, and 46 completed a successful home testing night wearing both the commercially available HSAT (Philips Alice NightOne Home Sleep, Koninklijke Philips N.V) and the wireless experimental system. A board-certified sleep medicine physician determined the apnea-hypopnea index (AHI) for the HSAT defined by American Academy of Sleep Medicine v2.6 guidelines. Two study investigators, blinded to the HSAT results, scored the experimental system to determine AHI based on similar guidelines. An independent study investigator conducted the final analysis of comparative performance. Participants completed a psychometric survey of their preferences, experience, and usability of the two testing systems.

**Results:** We demonstrated a high level of agreement between the HSAT and experimental system for AHI (r<sup>2</sup>=0.81, p<0.0001). The sensitivity and specificity of the experimental system to diagnose moderate and severe OSA (AHI>15) was 85% and 95%, respectively. The experimental system had a significantly higher Systems Usability Scale score compared to HSAT (61 vs 48, p<0.0001) and more than 85% of participants preferred the experimental system.

**Conclusion:** This study provides compelling evidence that the experimental system was highly acceptable and comparable to a currently used HSAT. Continued innovation in reliable, cost-effective, low profile technologies will be critical to address the unmet needs of sleep diagnostic testing.

**Support (if any):** Anthem and Sibel Inc.

## 404

# SLEEP-DISORDERED BREATHING IN NATIVE HAWAIIANS/PACIFIC ISLANDERS WITH ASSOCIATED COMORBIDITIES AND ADHERENCE TO THERAPY

Darin Ryujin,<sup>1</sup> Krishna Sundar,<sup>1</sup> Allyson Gilles<sup>1</sup>

<sup>1</sup>University of Utah

**Introduction:** Sleep-disordered breathing in Native Hawaiians and Pacific Islanders (NHPs), its relationship to type 2 diabetes mellitus (DM), chronic renal, and heart disease, is not well known. NHPs comprise only 1.3% of Utah's population, but have the highest rates of DM and deaths due to diabetic kidney disease in Utah. This study assessed the nature of sleep-disordered breathing, its association with demographic variables, and comorbidities, and adherence patterns to positive airway pressure (PAP) therapy.

**Methods:** University of Utah sleep clinics patient databases from 2014 were evaluated to identify NHPs using first/last names. Electronic medical records were reviewed to confirm patient ethnic origin, demographic data, and comorbidities. The most recent PAP downloads were obtained.

**Results:** Of 106 NHPs were identified, data available for 104 patients (71 males, 33 females) was analyzed. Mean age of males was 47 + 13 years and females 48±13 years. Prevalence rates of obesity were 13% (female 9%, male 15%) with BMI≥30, 33% (female 24%, male 23%) with BMI≥35, and 49% (female 58%, Male 23%) with BMI≥40. Majority of patients had severe OSA (61% males with AHI≥30; 39% females with ≥ 30), with overall mean AHI of 47±38. A high prevalence of comorbidities was noted: 61% hypertension (male 58%; female 67%), diabetes 54% (male 48%, female 67%),

renal disease 20% (male 21%, female 18%), coronary artery disease 13% (male 14%, female 9%), and congestive heart failure 13% (male 15%, female 9%). Prevalence of lung disease was low 13% (male 9%, female 18%).

**Conclusion:** NHPs evaluated for sleep-disordered breathing have high rates of obesity, severe OSA, and concerning comorbidities. PAP adherence in this group was poor compared to overall adherence for patients seen in University of Utah sleep clinics (~70%). Further research is required to assess the relationships between OSA, associated comorbidities, and disease outcomes. Addressing low rates of PAP adherence in this population may afford opportunities to improve health outcomes.

**Support (if any):** n/a

## 405

### THE EFFECT OF A PATIENT SURVEY IN THE EVALUATION OF OBSTRUCTIVE SLEEP APNEA IN A HIGH RISK CARDIOLOGY OUTPATIENT POPULATION

Dev Patel,<sup>1</sup> Ishan Patel,<sup>1</sup> Marc Cohen,<sup>2</sup> Sunil Patel<sup>1</sup>

<sup>1</sup>Primeheart, <sup>2</sup>Newark Beth Israel Medical Center

**Introduction:** Obstructive sleep apnea (OSA) is the most common sleep-related breathing disorder. The estimated prevalence is approximately 15 to 30 percent in males and 10 to 15 percent in females. Patients with OSA have an increased propensity for cardiovascular diseases and obesity. Observational studies have demonstrated a consistent association between OSA and hypertension, coronary artery disease, cardiac arrhythmias, and heart failure. The purpose of this study is to evaluate if a patient survey can improve the diagnosis of OSA in a high-risk outpatient cardiac clinic.

**Methods:** In an outpatient cardiac clinic, a retrospective analysis of OSA evaluations was done before and after the use of patient surveys in a high-risk population. The high-risk patient group was defined by the presence of two or more of the following conditions: hypertension, heart failure, cardiac arrhythmias, atrial fibrillation, obesity with a BMI of 30 or more, coronary artery disease, diabetes mellitus, chronic lung disease, history of cerebrovascular accident (CVA), hypothyroidism and chronic renal insufficiency. The patient survey included questions on the presence of daytime sleepiness, presence of snoring, ESS score, choking in sleep, witness apnea, and frequent waking in sleep.

**Results:** During the four months of patient survey use, a total of 143 patients were evaluated as compared to 86 patients in the prior four months without the use of the survey. A significant increase (66.3%) of OSA evaluations was observed during the patient survey period.

**Conclusion:** The use of patient surveys showed a significant improvement in OSA diagnoses in the defined high-risk patient group. Patient surveys might be beneficial to improve the under diagnosis of sleep apnea in high-risk patient populations. Additional research needs to be done to establish the impact of such intervention on patient outcomes.

**Support (if any):**

## 406

### CLINICAL VALIDATION OF AI SCORING IN ADULT AND PEDIATRIC CLINICAL PSG SAMPLES COMPARED TO PROSPECTIVE, DOUBLE-BLIND SCORING PANEL

Chris Fernandez,<sup>1</sup> Sam Rusk,<sup>1</sup> Nick Glattard,<sup>1</sup> Yoav Nygate,<sup>1</sup> Fred Turkington,<sup>1</sup> Nathaniel Watson<sup>2</sup>

<sup>1</sup>EnsoData Research, EnsoData, <sup>2</sup>Department of Neurology, University of Washington School of Medicine,

**Introduction:** Despite an appreciable rise in sleep wellness and sleep medicine A.I. research publications, public data corpuses, institutional

support, and health A.I. research funding opportunities, the availability of controlled-retrospective, hybrid-retrospective-prospective, and prospective-RCT quality clinical validation study evidence is limited with respect to their potential clinical impact. Furthermore, only a few practical examples of A.I. technologies are validated, in use today clinically, and widely adopted, to assist in sleep diagnoses and treatment. In this study, we contribute to this growing body of clinical A.I. validation evidence and experimental design methodologies with an interoperable A.I. scoring engine in Adult and Pediatric populations.

**Methods:** Stratified random sampling with proportionate allocation was applied to a database of N>10,000 retrospective diagnostic clinical polysomnography (PSG), selected by evidence grading standards, with controls applied for OSA severity, diagnoses; sleep, psychiatric, neurologic, neurodevelopmental, cardiac, pulmonary, metabolic disorders, medications; benzodiazepines, antidepressants, stimulants, opiates, sleep aids, demographic groups of interest; sex, adult age, pediatric age, BMI, weight, height, and patient-reported sleepiness, to establish representative N=100 Adult and N=100 Pediatric samples. Double Blinded scoring was prospectively collected for each sample by 3 experienced RPSGT certified sleep technologists randomized from a pool of 9 scorers. Sensitivity (PA), Specificity (NA), Accuracy (OA), Kappa (K), and 95% Bootstrap CI's are presented for sleep stages, OSA/CSA, hypopnea 3%/4%, arousals, limb movements, Cheyenne-Stokes respiration, periodic breathing, atrial fibrillation, and other events, and normative, mild, moderate, and severe OSA categories for global-AHI and REM-AHI. Results for Sleep Staging and OSA Severity Diagnostic Accuracy are summarized.

**Results:** A.I. scoring performance meet but in most cases exceeded initial clinical validation study (N=72 Adults, 2017) PA, NA, OA, K point-estimates and confidence-interval results for the 26 event types and 8 AHI-categories evaluated. The Adult sample showed 87%/94% Sensitivity/Specificity across all stages (Wake/N1/N2/N3/REM) and 94%/96% Sensitivity/Specificity for AHI>=15. The Pediatric sample showed 87%/93% Sensitivity/Specificity staging, 89%/98% Sensitivity/Specificity AHI>=15. Observed Accuracy was >90% for Adults and Pediatrics all 26 events and 7 AHI-categories analyzed, except REM-AHI>=5 (85%/82% Adults/Pediatrics).

**Conclusion:** We provide clinical validation evidence that demonstrates interoperable A.I. scoring performance in representative Adult and Pediatric patient clinical PSG samples when compared to prospective, double-blind scoring panel.

**Support (if any):**

## 407

### EXPLANATORY ANALYSIS OF POLYSOMNOGRAPHY FOR THE IDENTIFICATION OF SLEEP APNEA HYPOPNEA EVENTS USING DEEP LEARNING NEURAL NETWORK

Soonhyun Yook,<sup>1</sup> Chaitanya Gupte,<sup>2</sup> Zhixian Han,<sup>2</sup> Eun Yeon Joo,<sup>3</sup> Hea Ree Park,<sup>4</sup> Hosung Kim<sup>2</sup>

<sup>1</sup>University of Southern California, <sup>2</sup>USC Stevens Neuroimaging and Informatics Institute, Keck School of Medicine of USC, University of Southern California, <sup>3</sup>Department of Neurology, Neuroscience Center, Samsung Medical Center, Samsung Biomedical Research Institute, School of Medicine, Sungkyunkwan University, <sup>4</sup>Department of Neurology, Inje University College of Medicine, Ilsan Paik Hospital

**Introduction:** Using deep learning algorithms, we investigated univariate and multivariate effects of four polysomnography features including heart rate (HR), electrocardiogram (ECG), oxygen saturation (SpO2) and nasal air flow (NAF) on the identification of sleep apnea and hypopnea events. This explanatory analysis that may clarify
